# Supplementary material
Source: publisher figshare collection journal article supplement (https://sage.figshare.com/ndownloader/files/20098394)
Supplement: Supplementary file 1 [file 20098394]

| **Supplement 2** | | | |
| --- | --- | --- | --- |
| Respondents* | | | |
| 1 | Account Manager/Instructor | 52 | Laboratory Safety Specialist |
| 2 | Agriculturist (Containment Scientist-Entomology, Non-Insect Arthropods, Mollusks) | 53 | Life Sciences Director |
| 3 | Alternate Biosafety Officer | 54 | lw |
| 4-8 | Assistant/Associate Biosafety Officer | 55 | Manager, Research Integrity and Compliance |
| 9 | Associate Director of Compliance and Biosafety | 56 | PhD Candidate |
| 10 | Associate Director Res. Health & Safety, Biosafety | 57 | Planetary Protection |
| 11 | Biosafety Coordinator | 58 | Professor |
| 12 | Biosafety Manager | 59 | Professor / Principal Investigator / Lab Director |
| 13 | Biosafety Manager | 60 | Professor and Chair of Dept of Biology and Biochemistry |
| 14-36 | Biosafety Office | 61 | Program Manager |
| 37 | Biosafety Specialist | 62 | Radiation Safety Officer/Biosafety Officer |
| 38 | CEO | 63 | Research Compliance Manager |
| 39 | Consultant | 64 | Responsible Official |
| 40 | Consultant Veterinarian | 65 | Safety and Security Unit Lead |
| 41 | Director of Biosafety and Biosecurity | 66 | Safety Officer |
| 42 | Director of Research operations and Biosafety Officer | 67 | Safety Specialist, Biosafety Program |
| 43 | Director Research Safety Committees | 68 | Senior Biosafety Officer |
| 44 | Environmental Compliance & Lab Safety Manager | 69 | Senior entomologist |
| 45 | Environmental Health & Safety Manager/Biosafety Officer | 70 | Sr. Biosafety Specialist |
| 46 | Facility Manager | 71 | Sr. Safety Officer - lab safety |
| 47 | Head Research compliance & EOHS | 72 | Technical Officer, Biosafety & Radiation Safety |
| 48 | IBC Administrator | 73 | Technical Official of the Ministry of Health |
| 49 | Institutional Biosafety Officer | 74 | university biosafety officer |
| 50 | Laboratory Safety Coordinator/Biosafety Officer | 75 | University biosafety officer |
| 51 | Laboratory Safety Manager & Biological Safety Officer | 76 | USDA Compliance Strategy Lead |
| * verbatum list of respondents response to self identify | |  |  |
